# Supplementary material for: MFIT 1.0.0: Multi-Flow Inversion of Tracer breakthrough curves in fractured and karst aquifers
Source: Copernicus journal article supplement (doi:10.5194/gmd-13-2905-2020), 2020-07-01
Supplement: Supplementary file 1 [file gmd-13-2905-2020-supplement.zip]

Archive with 3 entries (3 files):
- Table S1.xlsx
- Table_S1_Caption.docx
- gmd-13-2905-2020-supplement-title-page.pdf
