# Supplementary material for: MFIT 1.0.0: Multi-Flow Inversion of Tracer breakthrough curves in fractured and karst aquifers
Source: Copernicus journal article supplement (doi:10.5194/gmd-13-2905-2020), 2020-07-01
Supplement: Supplementary file 1 [file gmd-13-2905-2020-supplement.zip › gmd-13-2905-2020-supplement-title-page.pdf]

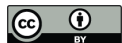

## *Supplement of*

# **MFIT 1.0.0: Multi-Flow Inversion of Tracer breakthrough curves in fractured and karst aquifers**

**Jacques Bodin**

*Correspondence to:* Jacques Bodin ([jacques.bodin@univ-poitiers.fr](mailto:jacques.bodin@univ-poitiers.fr))

- [gmd-13-2905-2020-supplement-title-page.pdf](#)
- [Table S1.xlsx](#)
- [Table\\_S1\\_Caption.docx](#)

The copyright of individual parts of the supplement might differ from the CC BY 4.0 License.
