# Supplementary material for: MFIT 1.0.0: Multi-Flow Inversion of Tracer breakthrough curves in fractured and karst aquifers
Source: Copernicus journal article supplement (doi:10.5194/gmd-13-2905-2020), 2020-07-01
Supplement: Supplementary file 1 [file gmd-13-2905-2020-supplement.zip › Table_S1_Caption.docx]

Model parameter values and composite parameter sensitivities related to the simulated tracer breakthrough curves of Fig. 5 in the article [*Bodin, J.: MFIT 1.0.0: Multiflow inversion of tracer breakthrough curves in fractured and karst aquifers, Geosci. Model Dev. Discuss., https://doi.org/10.5194/gmd-2019-286, in review, 2020*](https://www.geosci-model-dev-discuss.net/gmd-2019-286/). Since no parameters were fixed prior to the inversion process, a degree of freedom remains in the optimized parameter pairs (Q, mj) and (C0, Qj/Q). The values of these parameters were rescaled using the recovered tracer mass, which were calculated independently from the experimental data.
