# Supplementary material for: MFIT 1.0.0: Multi-Flow Inversion of Tracer breakthrough curves in fractured and karst aquifers
Source: Copernicus journal article supplement (doi:10.5194/gmd-13-2905-2020), 2020-07-01
Supplement: Supplementary file 1 [file Table S1.xlsx]

## Sheet: Feuil1
Tracer test	Injected mass (g)	Recovered mass (g)	Recovery ratio	Model	Number of channels	Parameter	Unit	Minimum value	Maximum value	Optimized value	Post-calibration scaled value	Composite parameter sensitivity
P2-M22	2	1.152	0.576	MDMi	1	Q	m3 h-1	1e-10	50	0.68753	8.69501	0.0002
						m1	g	1e-10	2	0.0910907	1.152	0.0002
						T01	h	1	120	37.0121	37.0121	0.00045
						Pe1	-	1	100000	18.0106	18.0106	9.3e-05
P2-M22	2	1.152	0.576	MDMed	1	C0	mg l-1	1e-05	100000	392.464	0.00775026	0.00021
						Q1/Q	-	1e-10	1	1.97477e-05	1	0.00021
						T01	h	1	120	23.6242	23.6242	0.00048
						Pe1	-	1	100000	79.3168	79.3168	0.00016
						g1	-	1e-10	1	0.967751	0.967751	0.0047
P2-M22	2	1.152	0.576	MPD-SFDM	1	Q	m3 h-1	1e-10	50	2.19143	8.63586	0.0002
						m1	g	1e-10	2	0.29233	1.152	0.0002
						T01	h	1	120	36.8076	36.8076	0.00045
						Pe1	-	1	100000	18.2922	18.2922	9.3e-05
						b1	h-1/2	1e-10	0.001	0.001	0.001	3.1e-06
P2-M22	2	1.152	0.576	MDP-2RNE	1	Q	m3 h-1	1e-10	50	0.277674	7.35623	0.0002
						m1	g	1e-10	2	0.0434843	1.152	0.00021
						L1	m	289	2890	290.59	290.59	7.1e-05
						T01	h	1	120	32.7126	32.7126	0.00048
						Pe1	-	1	100000	34.073	34.073	7.6e-05
						Ψ1	-	1e-10	0.99	0.684914	0.684914	0.00015
						w1	m-1	1e-10	10000000000	0.0023097	0.0023097	7.1e-05
P2-M22	2	1.152	0.576	MDMi	2	Q	m3 h-1	1e-10	50	0.966087	7.39428	0.00021
						m1	g	1e-10	2	0.0837307	0.640861	0.00016
						m2	g	1e-10	2	0.066782	0.511139	9.6e-07
						T01	h	1	120	32.4519	32.4519	7.2e-05
						T02	h	1	120	65.1686	65.1686	0.068
						Pe1	-	1	100000	32.3837	32.3837	5.6e-05
						Pe2	-	1	100000	8.99658	8.99658	3.4e-05
P2-M22	2	1.152	0.576	MDMed	2	C0	mg l-1	1e-05	100000	326.955	0.0227966	0.00021
						Q1/Q	-	1e-10	1	6.27937e-05	0.900605	2.3e-10
						Q2/Q	-	1e-10	1	6.93018e-06	0.0993945	7.4e-05
						T01	h	1	120	27.827	27.827	0.015
						T02	h	1	120	34.8023	34.8023	7.9e-05
						Pe1	-	1	100000	35.5877	35.5877	0.0006
						Pe2	-	1	100000	23.7643	23.7643	60
						g1	-	1e-10	1	0.48877	0.48877	9.3e-05
						g2	-	1e-10	1	0.904251	0.904251	3.3e-06
P2-M22	2	1.152	0.576	MPD-SFDM	2	Q	m3 h-1	1e-10	50	3.08165	7.41109	0.00021
						m1	g	1e-10	2	0.26485	0.636941	0.0003
						m2	g	1e-10	2	0.214169	0.515059	7.1e-05
						T01	h	1	120	32.2224	32.2224	0.00012
						T02	h	1	120	62.9662	62.9662	0.00012
						Pe1	-	1	100000	33.2811	33.2811	0.089
						Pe2	-	1	100000	9.39909	9.39909	0.0056
						b1	h-1/2	1e-10	0.001	0.001	0.001	2.1e-09
						b2	h-1/2	1e-10	0.001	0.001	0.001	1.4e-08
P2-M22	2	1.152	0.576	MDP-2RNE	2	Q	m3 h-1	1e-10	50	0.404575	7.05176	0.00021
						m1	g	1e-10	2	0.0308428	0.537591	0.00012
						m2	g	1e-10	2	0.03525	0.614409	8.7e-05
						L1	m	289	2890	292.842	292.842	6.7e-05
						L2	m	289	2890	291.001	291.001	5.9e-05
						T01	h	1	120	22.0958	22.0958	0.00032
						T02	h	1	120	32.3703	32.3703	0.00021
						Pe1	-	1	100000	257.445	257.445	1.1e-05
						Pe2	-	1	100000	58.6621	58.6621	2.6e-05
						Ψ1	-	1e-10	0.99	0.620342	0.620342	0.00027
						Ψ2	-	1e-10	0.99	0.464342	0.464342	6.5e-05
						w1	m-1	1e-10	10000000000	0.0108215	0.0108215	6.7e-05
						w2	m-1	1e-10	10000000000	0.00457737	0.00457737	5.9e-05
P2-M22	2	1.152	0.576	MDMi	3	Q	m3 h-1	1e-10	50	1.18263	7.24012	0.00021
						m1	g	1e-10	2	0.0512978	0.314046	9.5e-05
						m2	g	1e-10	2	0.0743029	0.454884	9e-07
						m3	g	1e-10	2	0.0625722	0.383069	5.1e-08
						T01	h	1	120	28.5758	28.5758	0.04
						T02	h	1	120	38.6162	38.6162	0.00029
						T03	h	1	120	80.403	80.403	0.00013
						Pe1	-	1	100000	51.3323	51.3323	0.039
						Pe2	-	1	100000	30.043	30.043	2.8e-05
						Pe3	-	1	100000	8.97843	8.97843	2.3e-05
P2-M22	2	1.152	0.576	MDMed	3	C0	mg l-1	1e-05	100000	413.052	0.0366182	0.00021
						Q1/Q	-	1e-10	1	5.04487e-05	0.56906	4.4e-10
						Q2/Q	-	1e-10	1	3.29542e-05	0.371723	0.00011
						Q3/Q	-	1e-10	1	5.24976e-06	0.0592172	1.5e-11
						T01	h	1	120	26.504	26.504	50
						T02	h	1	120	33.9836	33.9836	0.001
						T03	h	1	120	54.3894	54.3894	0.00071
						Pe1	-	1	100000	51.8759	51.8759	0.0012
						Pe2	-	1	100000	29.9409	29.9409	4.5e-05
						Pe3	-	1	100000	9.378	9.378	84
						g1	-	1e-10	1	0.124439	0.124439	4.3e-07
						g2	-	1e-10	1	0.150176	0.150176	1.9e-07
						g3	-	1e-10	1	0.132485	0.132485	1.4e-06
P2-M22	2	1.152	0.576	MPD-SFDM	3	Q	m3 h-1	1e-10	50	4.09633	7.18846	0.00021
						m1	g	1e-10	2	0.163924	0.287663	0.00032
						m2	g	1e-10	2	0.266874	0.468325	0.00011
						m3	g	1e-10	2	0.225666	0.396012	1.8e-06
						T01	h	1	120	28.2789	28.2789	0.015
						T02	h	1	120	37.8622	37.8622	6e-05
						T03	h	1	120	78.7816	78.7816	0.12
						Pe1	-	1	100000	53.4493	53.4493	3.8e-05
						Pe2	-	1	100000	30.3152	30.3152	0.00035
						Pe3	-	1	100000	8.53305	8.53305	0.0018
						b1	h-1/2	1e-10	0.001	0.001	0.001	9.5e-10
						b2	h-1/2	1e-10	0.001	0.001	0.001	8.5e-07
						b3	h-1/2	1e-10	0.001	0.001	0.001	2.8e-09
P2-M22	2	1.152	0.576	MDP-2RNE	3	Q	m3 h-1	1e-10	50	0.463835	7.07395	0.00021
						m1	g	1e-10	2	0.0363005	0.553618	0.00014
						m2	g	1e-10	2	0.0264377	0.403201	7.4e-05
						m3	g	1e-10	2	0.0127979	0.195181	1.8e-05
						L1	m	289	2890	293.943	293.943	6.9e-05
						L2	m	289	2890	292.705	292.705	4e-05
						L3	m	289	2890	298.001	298.001	9.7e-06
						T01	h	1	120	21.839	21.839	0.00043
						T02	h	1	120	31.1257	31.1257	0.00017
						T03	h	1	120	36.5028	36.5028	3.5e-05
						Pe1	-	1	100000	258.4	258.4	1.3e-05
						Pe2	-	1	100000	137.535	137.535	1e-05
						Pe3	-	1	100000	9180.4	9180.4	9.5e-08
						Ψ1	-	1e-10	0.99	0.673555	0.673555	0.00038
						Ψ2	-	1e-10	0.99	0.610873	0.610873	0.00013
						Ψ3	-	1e-10	0.99	0.319057	0.319057	3.5e-05
						w1	m-1	1e-10	10000000000	0.0118115	0.0118115	6.9e-05
						w2	m-1	1e-10	10000000000	0.00814387	0.00814387	4e-05
						w3	m-1	1e-10	10000000000	0.0228731	0.0228731	9.7e-06
M16-M22	2	1.576	0.788	MDMi	1	Q	m3 h-1	1e-10	60	0.0706759	25.1049	0.00025
						m1	g	1e-10	2	0.0044368	1.576	0.00025
						T01	h	1	40	13.2713	13.2713	0.00047
						Pe1	-	1	100000	12.4353	12.4353	0.00012
M16-M22	2	1.576	0.788	MDMed	1	C0	mg l-1	1e-05	100000	28.0371	0.00863458	0.00025
						Q1/Q	-	1e-10	1	0.00030797	1	0.00025
						T01	h	1	40	7.33761	7.33761	0.00053
						Pe1	-	1	100000	78.8012	78.8012	0.00019
						g1	-	1e-10	1	0.975655	0.975655	0.0076
M16-M22	2	1.576	0.788	MPD-SFDM	1	Q	m3 h-1	1e-10	60	2.09982	25.0084	0.00025
						m1	g	1e-10	2	0.132328	1.576	0.00025
						T01	h	1	40	13.2261	13.2261	0.028
						Pe1	-	1	100000	12.5269	12.5269	0.00045
						b1	h-1/2	1e-10	0.001	0.001	0.001	9.5e-09
M16-M22	2	1.576	0.788	MDP-2RNE	1	Q	m3 h-1	1e-10	60	0.60167	24.8201	0.00025
						m1	g	1e-10	2	0.0382042	1.576	0.00026
						L1	m	112	1120	122.921	122.921	0.00014
						T01	h	1	40	8.07616	8.07616	0.00055
						Pe1	-	1	100000	113.184	113.184	3.8e-05
						Ψ1	-	1e-10	0.99	0.580065	0.580065	0.00041
						w1	m-1	1e-10	10000000000	0.0184186	0.0184186	0.00014
M16-M22	2	1.576	0.788	MDMi	2	Q	m3 h-1	1e-10	60	0.0776335	25.0504	0.00026
						m1	g	1e-10	2	0.000778152	0.25109	2.3e-08
						m2	g	1e-10	2	0.00410603	1.32491	0.00021
						T01	h	1	40	8.552	8.552	0.84
						T02	h	1	40	14.534	14.534	9.8e-05
						Pe1	-	1	100000	86.2219	86.2219	3.4e-05
						Pe2	-	1	100000	14.5631	14.5631	0.00061
M16-M22	2	1.576	0.788	MDMed	2	C0	mg l-1	1e-05	100000	26.7028	0.0131965	0.00026
						Q1/Q	-	1e-10	1	0.000215643	0.436347	0.00018
						Q2/Q	-	1e-10	1	0.000278558	0.563653	1.8e-08
						T01	h	1	40	6.96938	6.96938	4.3e-06
						T02	h	1	40	11.149	11.149	0.18
						Pe1	-	1	100000	212.556	212.556	61
						Pe2	-	1	100000	17.8852	17.8852	0.00028
						g1	-	1e-10	1	0.991848	0.991848	3.6e-06
						g2	-	1e-10	1	0.131311	0.131311	2.6e-06
M16-M22	2	1.576	0.788	MPD-SFDM	2	Q	m3 h-1	1e-10	60	2.3051	24.9457	0.00026
						m1	g	1e-10	2	0.0231043	0.250033	7.6e-05
						m2	g	1e-10	2	0.122526	1.32597	0.0001
						T01	h	1	40	8.53679	8.53679	0.00036
						T02	h	1	40	14.4795	14.4795	5.5e-06
						Pe1	-	1	100000	87.3176	87.3176	0.15
						Pe2	-	1	100000	14.6316	14.6316	0.028
						b1	h-1/2	1e-10	0.001	0.001	0.001	2.9e-08
						b2	h-1/2	1e-10	0.001	0.001	0.001	6.7e-09
M16-M22	2	1.576	0.788	MDP-2RNE	2	Q	m3 h-1	1e-10	60	0.647121	22.6546	0.00026
						m1	g	1e-10	2	0.0359761	1.25946	0.00024
						m2	g	1e-10	2	0.00904177	0.316537	3e-05
						L1	m	112	1120	123.228	123.228	0.00013
						L2	m	112	1120	125.526	125.526	2.5e-05
						T01	h	1	40	7.96624	7.96624	0.00056
						T02	h	1	40	15.2414	15.2414	8.2e-05
						Pe1	-	1	100000	120.554	120.554	3.6e-05
						Pe2	-	1	100000	122.002	122.002	6.8e-06
						Ψ1	-	1e-10	0.99	0.616504	0.616504	0.00042
						Ψ2	-	1e-10	0.99	0.430505	0.430505	3e-05
						w1	m-1	1e-10	10000000000	0.0183616	0.0183616	0.00013
						w2	m-1	1e-10	10000000000	0.0150843	0.0150843	2.5e-05
M16-M22	2	1.576	0.788	MDMi	3	Q	m3 h-1	1e-10	60	0.0805409	23.5225	0.00026
						m1	g	1e-10	2	0.000977005	0.285341	3.1e-08
						m2	g	1e-10	2	0.00317259	0.926576	0.00018
						m3	g	1e-10	2	0.00124662	0.364083	4.5e-09
						T01	h	1	40	8.42835	8.42835	0.00042
						T02	h	1	40	13.4931	13.4931	1.3
						T03	h	1	40	25.7535	25.7535	1.3e-05
						Pe1	-	1	100000	82.6635	82.6635	0.00021
						Pe2	-	1	100000	22.2569	22.2569	0.75
						Pe3	-	1	100000	8.87521	8.87521	2e-05
M16-M22	2	1.576	0.788	MDMed	3	C0	mg l-1	1e-05	100000	26.53	0.0519705	0.00026
						Q1/Q	-	1e-10	1	0.00115985	0.592083	9.4e-05
						Q2/Q	-	1e-10	1	0.000719459	0.367271	3.8e-08
						Q3/Q	-	1e-10	1	7.96238e-05	0.0406465	7.5e-11
						T01	h	1	40	8.04651	8.04651	0.00021
						T02	h	1	40	11.3927	11.3927	2.8
						T03	h	1	40	17.394	17.394	0.00066
						Pe1	-	1	100000	81.8524	81.8524	0.00051
						Pe2	-	1	100000	22.7449	22.7449	0.0009
						Pe3	-	1	100000	9.70017	9.70017	5.3
						g1	-	1e-10	1	0.137693	0.137693	5.4e-07
						g2	-	1e-10	1	0.118853	0.118853	3.9e-07
						g3	-	1e-10	1	0.130071	0.130071	1.3e-06
M16-M22	2	1.576	0.788	MPD-SFDM	3	Q	m3 h-1	1e-10	60	3.36743	23.4616	0.00026
						m1	g	1e-10	2	0.0410191	0.285789	9.2e-05
						m2	g	1e-10	2	0.134704	0.938513	0.00014
						m3	g	1e-10	2	0.0504788	0.351697	2.5e-06
						T01	h	1	40	8.4163	8.4163	4.1e-06
						T02	h	1	40	13.4794	13.4794	0.018
						T03	h	1	40	25.8512	25.8512	0.046
						Pe1	-	1	100000	83.2168	83.2168	0.0027
						Pe2	-	1	100000	22.1984	22.1984	8.1e-05
						Pe3	-	1	100000	9.11574	9.11574	0.0073
						b1	h-1/2	1e-10	0.001	0.001	0.001	4.1e-07
						b2	h-1/2	1e-10	0.001	0.000956269	0.000956269	2.4e-09
						b3	h-1/2	1e-10	0.001	0.000955302	0.000955302	2.1e-09
M16-M22	2	1.576	0.788	MDP-2RNE	3	Q	m3 h-1	1e-10	60	0.696776	23.0263	0.00026
						m1	g	1e-10	2	0.0274534	0.907251	0.0002
						m2	g	1e-10	2	0.00908882	0.300358	5.5e-05
						m3	g	1e-10	2	0.0111475	0.368391	4.1e-05
						L1	m	112	1120	123.543	123.543	9.2e-05
						L2	m	112	1120	127.355	127.355	2.7e-05
						L3	m	112	1120	125.901	125.901	2.9e-05
						T01	h	1	40	7.76877	7.76877	0.00057
						T02	h	1	40	9.33359	9.33359	0.00015
						T03	h	1	40	14.9428	14.9428	0.00011
						Pe1	-	1	100000	132.754	132.754	3.3e-05
						Pe2	-	1	100000	1550.86	1550.86	6.3e-07
						Pe3	-	1	100000	96.1989	96.1989	1e-05
						Ψ1	-	1e-10	0.99	0.707469	0.707469	0.00045
						Ψ2	-	1e-10	0.99	0.539672	0.539672	0.00015
						Ψ3	-	1e-10	0.99	0.50564	0.50564	4e-05
						w1	m-1	1e-10	10000000000	0.0180021	0.0180021	9.2e-05
						w2	m-1	1e-10	10000000000	0.049267	0.049267	2.7e-05
						w3	m-1	1e-10	10000000000	0.0128634	0.0128634	2.9e-05
MP6-M22	2	1.194	0.597	MDMi	2	Q	m3 h-1	1e-10	60	0.780622	10.1834	0.00044
						m1	g	1e-10	2	0.0314815	0.410683	0.00022
						m2	g	1e-10	2	0.0600463	0.783317	3.6e-06
						T01	h	1	40	10.296	10.296	3.5e-05
						T02	h	1	40	17.2741	17.2741	0.076
						Pe1	-	1	100000	29.4066	29.4066	0.00078
						Pe2	-	1	100000	10.5089	10.5089	0.00013
MP6-M22	2	1.194	0.597	MDMed	2	C0	mg l-1	1e-05	100000	4659.61	0.0773827	0.00044
						Q1/Q	-	1e-10	1	1.31867e-05	0.794039	5e-05
						Q2/Q	-	1e-10	1	3.42042e-06	0.205961	2.3e-10
						T01	h	1	40	8.1161	8.1161	6.9e-07
						T02	h	1	40	8.18161	8.18161	9.7e-05
						Pe1	-	1	100000	486.182	486.182	60000
						Pe2	-	1	100000	34.9903	34.9903	0.0035
						g1	-	1e-10	1	0.117573	0.117573	1.1e-06
						g2	-	1e-10	1	0.931396	0.931396	0.0044
MP6-M22	2	1.194	0.597	MPD-SFDM	2	Q	m3 h-1	1e-10	60	0.832476	10.1722	0.00044
						m1	g	1e-10	2	0.031464	0.384465	0.00021
						m2	g	1e-10	2	0.0662512	0.809535	0.00013
						T01	h	1	40	10.1753	10.1753	0.00059
						T02	h	1	40	16.9496	16.9496	5.1e-05
						Pe1	-	1	100000	30.8887	30.8887	0.13
						Pe2	-	1	100000	10.7157	10.7157	0.026
						b1	h-1/2	1e-10	0.001	0.000722933	0.000722933	2.1e-08
						b2	h-1/2	1e-10	0.001	0.001	0.001	1.2e-08
MP6-M22	2	1.194	0.597	MDP-2RNE	2	Q	m3 h-1	1e-10	60	0.133511	10.1212	0.00044
						m1	g	1e-10	2	0.00562431	0.426368	0.0002
						m2	g	1e-10	2	0.010126	0.767632	0.00026
						L1	m	112	1120	124.197	124.197	9.2e-05
						L2	m	112	1120	120.641	120.641	0.0002
						T01	h	1	40	1.72127	1.72127	0.00047
						T02	h	1	40	8.06841	8.06841	0.00074
						Pe1	-	1	100000	2172.51	2172.51	9.2e-07
						Pe2	-	1	100000	440.507	440.507	2.8e-05
						Ψ1	-	1e-10	0.99	0.157947	0.157947	0.00047
						Ψ2	-	1e-10	0.99	0.467805	0.467805	0.00039
						w1	m-1	1e-10	10000000000	0.124981	0.124981	9.2e-05
						w2	m-1	1e-10	10000000000	0.022894	0.022894	0.0002
MP6-M22	2	1.194	0.597	MDMi	4	Q	m3 h-1	1e-10	60	0.896025	10.1876	0.00044
						m1	g	1e-10	2	0.0015406	0.0175164	2.2e-05
						m2	g	1e-10	2	0.0109646	0.124666	3.8e-07
						m3	g	1e-10	2	0.0186632	0.212198	5.7e-10
						m4	g	1e-10	2	0.0738464	0.83962	0.0008
						T01	h	1	40	5.67739	5.67739	0.0006
						T02	h	1	40	8.25544	8.25544	2e-06
						T03	h	1	40	11.4307	11.4307	0.082
						T04	h	1	40	16.8806	16.8806	0.00086
						Pe1	-	1	100000	318.538	318.538	0.00025
						Pe2	-	1	100000	215.4	215.4	0.83
						Pe3	-	1	100000	74.4597	74.4597	0.0022
						Pe4	-	1	100000	10.3919	10.3919	0.00014
MP6-M22	2	1.194	0.597	MDMed	4	C0	mg l-1	1e-05	100000	4733.68	0.1425	0.00044
						Q1/Q	-	1e-10	1	1.63212e-05	0.542169	9.9e-05
						Q2/Q	-	1e-10	1	2.73439e-06	0.0908333	2.7e-10
						Q3/Q	-	1e-10	1	7.51713e-06	0.24971	2.3e-12
						Q4/Q	-	1e-10	1	3.53075e-06	0.117287	8e-11
						T01	h	1	40	8.13151	8.13151	760
						T02	h	1	40	10.9509	10.9509	0.00038
						T03	h	1	40	10.8752	10.8752	0.00029
						T04	h	1	40	17.8172	17.8172	0.0011
						Pe1	-	1	100000	264.14	264.14	5800
						Pe2	-	1	100000	7.4288	7.4288	0.00043
						Pe3	-	1	100000	55.3563	55.3563	0.00014
						Pe4	-	1	100000	466.294	466.294	0.014
						g1	-	1e-10	1	0.113929	0.113929	0.66
						g2	-	1e-10	1	0.138334	0.138334	1.7e-06
						g3	-	1e-10	1	0.0891756	0.0891756	3.3e-09
						g4	-	1e-10	1	0.100744	0.100744	4.2e-07
MP6-M22	2	1.194	0.597	MPD-SFDM	4	Q	m3 h-1	1e-10	60	0.948817	10.1541	0.00044
						m1	g	1e-10	2	0.00162566	0.0173976	2.2e-05
						m2	g	1e-10	2	0.0117558	0.125809	3.3e-06
						m3	g	1e-10	2	0.0194557	0.208212	6.8e-07
						m4	g	1e-10	2	0.0787321	0.842581	2.3e-09
						T01	h	1	40	5.66986	5.66986	0.058
						T02	h	1	40	8.25236	8.25236	0.014
						T03	h	1	40	11.428	11.428	0.0012
						T04	h	1	40	16.7858	16.7858	4e-06
						Pe1	-	1	100000	324.601	324.601	2.2
						Pe2	-	1	100000	215.834	215.834	0.35
						Pe3	-	1	100000	76.0624	76.0624	0.0038
						Pe4	-	1	100000	10.4659	10.4659	7.9e-06
						b1	h-1/2	1e-10	0.001	0.000904391	0.000904391	3.3e-06
						b2	h-1/2	1e-10	0.001	0.000906392	0.000906392	2.3e-06
						b3	h-1/2	1e-10	0.001	0.000455496	0.000455496	1.3e-08
						b4	h-1/2	1e-10	0.001	0.001	0.001	1.3e-08
MP6-M22	2	1.194	0.597	MDP-2RNE	4	Q	m3 h-1	1e-10	60	0.57917	10.0953	0.00045
						m1	g	1e-10	2	0.00207368	0.0361455	3.9e-05
						m2	g	1e-10	2	0.0437323	0.76228	0.00036
						m3	g	1e-10	2	0.00774579	0.135014	8.1e-05
						m4	g	1e-10	2	0.0149485	0.260561	9.1e-05
						L1	m	112	1120	123.428	123.428	1.5e-05
						L2	m	112	1120	119.111	119.111	0.00021
						L3	m	112	1120	121.057	121.057	4.3e-05
						L4	m	112	1120	119.723	119.723	5.8e-05
						T01	h	1	40	3.72162	3.72162	0.00025
						T02	h	1	40	8.04208	8.04208	0.0011
						T03	h	1	40	10.0477	10.0477	0.00039
						T04	h	1	40	17.6028	17.6028	0.00036
						Pe1	-	1	100000	1588.9	1588.9	1.9e-06
						Pe2	-	1	100000	232.883	232.883	5.2e-05
						Pe3	-	1	100000	4075.15	4075.15	1.6e-06
						Pe4	-	1	100000	415.863	415.863	1.3e-05
						Ψ1	-	1e-10	0.99	0.6315	0.6315	0.00025
						Ψ2	-	1e-10	0.99	0.653494	0.653494	0.00069
						Ψ3	-	1e-10	0.99	0.745343	0.745343	0.00035
						Ψ4	-	1e-10	0.99	0.689361	0.689361	0.00018
						w1	m-1	1e-10	10000000000	0.209348	0.209348	1.5e-05
						w2	m-1	1e-10	10000000000	0.0181113	0.0181113	0.00021
						w3	m-1	1e-10	10000000000	0.0401073	0.0401073	4.3e-05
						w4	m-1	1e-10	10000000000	0.0176417	0.0176417	5.8e-05
MP6-M22	2	1.194	0.597	MDMi	6	Q	m3 h-1	1e-10	60	0.696611	10.065	0.00044
						m1	g	1e-10	2	0.00199414	0.0288123	3.3e-05
						m2	g	1e-10	2	0.00807121	0.116617	3.4e-07
						m3	g	1e-10	2	0.0474493	0.685571	3.2e-09
						m4	g	1e-10	2	0.00306447	0.0442769	4.3e-05
						m5	g	1e-10	2	0.00532365	0.0769188	5.4e-07
						m6	g	1e-10	2	0.0167356	0.241804	3.8e-09
						T01	h	1	40	5.76001	5.76001	0.042
						T02	h	1	40	8.17562	8.17562	0.00067
						T03	h	1	40	12.2337	12.2337	5.9e-05
						T04	h	1	40	23.3752	23.3752	0.19
						T05	h	1	40	18.2627	18.2627	0.00013
						T06	h	1	40	25.866	25.866	1.5e-06
						Pe1	-	1	100000	211.751	211.751	2
						Pe2	-	1	100000	214.817	214.817	0.0047
						Pe3	-	1	100000	32.0338	32.0338	3e-06
						Pe4	-	1	100000	183.69	183.69	0.79
						Pe5	-	1	100000	241.842	241.842	0.0014
						Pe6	-	1	100000	15.5787	15.5787	3.3e-05
MP6-M22	2	1.194	0.597	MDMed	6	C0	mg l-1	1e-05	100000	3949.36	0.190323	0.00045
						Q1/Q	-	1e-10	1	6.70933e-06	0.139224	3.3e-05
						Q2/Q	-	1e-10	1	1.9295e-05	0.400388	8.2e-10
						Q3/Q	-	1e-10	1	2.17654e-06	0.045165	2.7e-13
						Q4/Q	-	1e-10	1	1.15204e-06	0.0239059	7.3e-12
						Q5/Q	-	1e-10	1	1.24458e-05	0.258262	7.2e-05
						Q6/Q	-	1e-10	1	6.41202e-06	0.133055	6.6e-10
						T01	h	1	40	5.64675	5.64675	2.4e-06
						T02	h	1	40	8.02653	8.02653	0.0002
						T03	h	1	40	22.8857	22.8857	250
						T04	h	1	40	19.2513	19.2513	0.00014
						T05	h	1	40	10.7952	10.7952	1.1e-06
						T06	h	1	40	17.9595	17.9595	8.5e-05
						Pe1	-	1	100000	215.002	215.002	14000
						Pe2	-	1	100000	216.487	216.487	0.0016
						Pe3	-	1	100000	186.229	186.229	0.00081
						Pe4	-	1	100000	13.5431	13.5431	0.00019
						Pe5	-	1	100000	32.3323	32.3323	880
						Pe6	-	1	100000	242.606	242.606	0.022
						g1	-	1e-10	1	0.0962423	0.0962423	8.3e-07
						g2	-	1e-10	1	0.110039	0.110039	7.6e-06
						g3	-	1e-10	1	0.0996567	0.0996567	0.79
						g4	-	1e-10	1	0.0987325	0.0987325	2.2e-06
						g5	-	1e-10	1	0.106231	0.106231	1.8e-08
						g6	-	1e-10	1	0.101803	0.101803	1.1e-06
MP6-M22	2	1.194	0.597	MPD-SFDM	6	Q	m3 h-1	1e-10	60	0.809507	10.0445	0.00044
						m1	g	1e-10	2	0.002329	0.0288987	3.3e-05
						m2	g	1e-10	2	0.00944315	0.117172	3.6e-06
						m3	g	1e-10	2	0.0558221	0.692652	2.3e-06
						m4	g	1e-10	2	0.00638468	0.0792223	4.3e-10
						m5	g	1e-10	2	0.00372538	0.0462253	4.5e-05
						m6	g	1e-10	2	0.0185224	0.229829	2.9e-05
						T01	h	1	40	5.75482	5.75482	0.00059
						T02	h	1	40	8.16942	8.16942	1.9e-06
						T03	h	1	40	12.2546	12.2546	0.077
						T04	h	1	40	18.2446	18.2446	0.067
						T05	h	1	40	23.3339	23.3339	0.0019
						T06	h	1	40	26.0934	26.0934	0.00013
						Pe1	-	1	100000	212.666	212.666	1.7
						Pe2	-	1	100000	215.945	215.945	0.24
						Pe3	-	1	100000	31.8273	31.8273	0.00071
						Pe4	-	1	100000	241.258	241.258	2.3e-05
						Pe5	-	1	100000	183.394	183.394	1.2
						Pe6	-	1	100000	16.5161	16.5161	0.0092
						b1	h-1/2	1e-10	0.001	0.000914956	0.000914956	6.7e-09
						b2	h-1/2	1e-10	0.001	0.000848207	0.000848207	5e-11
						b3	h-1/2	1e-10	0.001	0.000423165	0.000423165	1.6e-06
						b4	h-1/2	1e-10	0.001	0.000843203	0.000843203	6.9e-07
						b5	h-1/2	1e-10	0.001	0.000997207	0.000997207	5.4e-09
						b6	h-1/2	1e-10	0.001	0.000999429	0.000999429	1.9e-09
MP6-M22	2	1.194	0.597	MDP-2RNE	6	Q	m3 h-1	1e-10	60	0.885957	10.0715	0.00045
						m1	g	1e-10	2	0.00373015	0.0424039	4.3e-05
						m2	g	1e-10	2	0.0171082	0.194484	0.00017
						m3	g	1e-10	2	0.0548017	0.622979	0.00032
						m4	g	1e-10	2	0.00188962	0.021481	2e-05
						m5	g	1e-10	2	0.0133923	0.152242	8.5e-05
						m6	g	1e-10	2	0.0141107	0.160409	5.7e-05
						L1	m	112	1120	122.564	122.564	1.8e-05
						L2	m	112	1120	121.595	121.595	7.6e-05
						L3	m	112	1120	120.191	120.191	0.00016
						L4	m	112	1120	121.208	121.208	8.9e-06
						L5	m	112	1120	120.162	120.162	4.1e-05
						L6	m	112	1120	120.612	120.612	2.9e-05
						T01	h	1	40	4.31486	4.31486	0.00025
						T02	h	1	40	6.41794	6.41794	0.0011
						T03	h	1	40	7.36344	7.36344	0.001
						T04	h	1	40	8.95228	8.95228	0.00019
						T05	h	1	40	15.9057	15.9057	0.00051
						T06	h	1	40	23.8479	23.8479	0.00026
						Pe1	-	1	100000	1550.02	1550.02	1.7e-06
						Pe2	-	1	100000	2623.94	2623.94	5.1e-06
						Pe3	-	1	100000	4098.27	4098.27	1.7e-06
						Pe4	-	1	100000	8677.27	8677.27	4e-07
						Pe5	-	1	100000	1873.74	1873.74	3.9e-06
						Pe6	-	1	100000	307.524	307.524	1.1e-05
						Ψ1	-	1e-10	0.99	0.711642	0.711642	0.00024
						Ψ2	-	1e-10	0.99	0.758831	0.758831	0.001
						Ψ3	-	1e-10	0.99	0.563056	0.563056	0.001
						Ψ4	-	1e-10	0.99	0.808685	0.808685	0.00019
						Ψ5	-	1e-10	0.99	0.805488	0.805488	0.00046
						Ψ6	-	1e-10	0.99	0.784415	0.784415	0.00013
						w1	m-1	1e-10	10000000000	0.0954871	0.0954871	1.8e-05
						w2	m-1	1e-10	10000000000	0.0759703	0.0759703	7.6e-05
						w3	m-1	1e-10	10000000000	0.062548	0.062548	0.00016
						w4	m-1	1e-10	10000000000	0.107558	0.107558	8.9e-06
						w5	m-1	1e-10	10000000000	0.0397353	0.0397353	4.1e-05
						w6	m-1	1e-10	10000000000	0.0132313	0.0132313	2.9e-05
